# Supplementary material for: Long-term visibility variation in Athens (1931–2013): A proxy for local and regional atmospheric aerosol loads
Source: Copernicus journal article supplement (doi:10.5194/acp-2015-1025), 2016-03-21
Supplement: Supplementary file [file acp-2015-1025-AC1-supplement.pdf]

1 **Author's response to referee#1**

2  
3 The authors are grateful to the anonymous referee # 1 for his/her time devoted to this  
4 paper and the useful comments and suggestions, aiming at the improvement of the  
5 manuscript.

6 All comments and recommendations of referee#1 were taken very seriously into  
7 consideration for the preparation of a revised version of the manuscript. Additional effort  
8 has been put to implement and incorporate suggestions in the manuscript to the best  
9 possible degree and prepare a revised version accounting for all comments of referee #1.

10 In the following, we present our answers to the referee's comments as well as the changes  
11 performed in the manuscript in the following order:

12 **A. Comments of referee #1**

13 **B. Authors' answers to each comment of referee #1**

14 **C. Changes in the manuscript to account for comments of referee #1**

15  
16 ***A. Comments of referee #1***

17 *In this article, Founda and coauthors describe the long term trend in visibility in Athens,*  
18 *Greece and compare this trend to meteorological variables, visibility changes at a nonurban*  
19 *site in the area, and satellite-derived aerosol optical depth values. The rapid degradation of*  
20 *visibility after 1950 and slight recovery since 2005 are correlated with meteorological*  
21 *conditions associated with air mass origin, PM10 surface measurements, and aerosol optical*  
22 *depth; these relationships suggest that visibility is a proxy for local and regional atmospheric*  
23 *aerosol levels. This trend and associated analyses provide a novel dataset for understanding*  
24 *long term changes in aerosol concentration near Athens. I'd suggest publication after the*  
25 *following comments have been addressed.*

26 **Major comments:**

27  
28 *1) While the grouping of 3 periods of visibility trends are appropriate when discussing*  
29 *changes over time, the middle period (1949-2003) is not appropriate when discussing*  
30 *frequencies (Figure 5) and seasonality (Figure 6) because the early part of the period has*  
31 *substantially different visibility conditions from the later period. When not showing a time*  
32 *series, the 1949-2003 period needs to be separated into*  
33 *several periods of more similar visibility conditions.*

34  
35 *2) I think that a more comprehensive comparison between emissions changes and*  
36 *visibility trends would help improve the article. Figure 11 needs to have emissions*  
37 *on the y-axis as a magnitude rather than a rate of change, and plotting other types*

38 of emissions (NO<sub>x</sub>, EC, OC, etc) would be interesting to see if available. If the emission  
39 data could be segregated by air mass origin, it would be interesting to see if  
40 increases/decreases of emissions in certain parts of Europe have affected the visibility  
41 in Athens.

42

43 3) To add value in the visibility-satellite AOD comparison, I'd suggest examining the much  
44 longer-term dataset of AOD values from the Advanced Very High Resolution Radiometer  
45 (AVHRR) satellite. Although AVHRR retrieves AOD only over ocean grid cells, selecting the  
46 nearest ocean cell to Athens would enable an visibility-AOD comparison since 1981 when  
47 visibility values were still degrading.

48

49 **Minor comment:**

50

51 1) Many typos and text spacing problems persist in the document and have to be corrected.  
52 The first of many are listed by page number; line number (suggested correction): Page 1; Line  
53 18 ("34%"), Page 1; Line 22 ("the 1950s"), Page 2; Line 46 ("containing"), Page 3; Line 82  
54 ("oldest time"), Page 4; Line 90 ("construction"), Page 5; Line 118 ("...the year. The  
55 periods..."), Page 5; Line 129 ("Mediterranean"), Page 5; Line 136 ("60%"), Page 6; Line 173  
56 ("Po Valley"), Page 7; Line 180 ("...subsequent reduction in vehicle use..."), Page 7; Line 201  
57 ("with the naked eye."), Page 8; Line 208 ("Davis (1991)."), Page 10; Line 272 ("Overall,  
58 visibility did not exceed..."), Page 11; Line 312 ("different approaches, as for instance..."),  
59 Page 12; Line 343 ("...resulting in the reduction of visibility."), Page 13; Line 364 ("In other  
60 cases..."), Page 14; Line 491 ("increase of construction in the city."). I'd recommend an  
61 grammatical editor to correct these and other errors prior to publication in final form.

62

63 2) Figure 2a should be referenced in the text before Figure 2b.

64

65

66 **B. Author's answers to the comments of referee #1**

67

68 **Major Comments**

69

70 1. Indeed, the grouping of the historical time series was mainly indicated by the different  
71 slopes of trends observed in the three sub-periods 1931-1948, 1949-2003 and 2004-2013. It  
72 is true that the early part of the much longer sub-period (1949-2003) is characterized by  
73 different visibility conditions compared to the latter part. For this reason, the initial grouping  
74 was maintained only in trend analysis. In all other cases, namely when studying frequency  
75 distribution (Fig. 5), seasonality (Fig.6) but also variation of visibility with wind direction (Fig.  
76 10), the long period 1949-2003, was further divided into two parts, 1949-1975 and 1976-

77 2003. Figures 5, 6 and 10 were reproduced, where the plots concerning the 1949-2003 sub-  
78 period, were replaced by plots for the periods 1949-1975 and 1976-2003 (see section C  
79 below). The text in the manuscript in sections 3.2, 3.3 and 4.4.2 was revised accordingly,  
80 accounting for the new information derived from this additional grouping.

81

82 **2.** Historical data of other types of emissions for Europe such as NO<sub>x</sub> and OC were also  
83 considered and discussed in the manuscript. Plot of rates of changes of SO<sub>2</sub> emissions in Fig.  
84 11 of the manuscript was now replaced with the plot of SO<sub>2</sub> emissions as a magnitude for a  
85 more direct comparison with visibility variations. Moreover, a plot of historical NO<sub>x</sub>  
86 emissions for Europe was added in Fig. 11. Details are provided in section C below.

87

88 **3.** We have followed the reviewer's recommendation and used the AVHRR satellite data  
89 (available since 1981) in addition to support the current MODIS related analysis concerning  
90 AOD and visibility. The additional analysis was incorporated in the manuscript accordingly as  
91 described below (see section C).

#### 92 **Minor comments of referee #1**

93 **1.** Although a grammatical editor had been already used, for some reason it didn't work  
94 properly and a number of grammatical and syntax errors remained in the text. Additional  
95 effort and a new editor have been used now to cope with this problem. All suggested first  
96 corrections by the referee were applied in the text. Additional syntax errors were also found  
97 and corrected.

98 **2.** This was corrected.

99

#### 100 ***C. Changes in the manuscript to account for the comments of referee#1***

101 **1.** In order to comply with major comment 1, Figs 5, 6 and 10 concerning the frequency  
102 distribution, seasonality and variation of visibility with wind direction were reproduced. In  
103 the new figures, the sub period 1949-2003 was replaced by two additional sub-periods,  
104 namely 1949-1975 and 1976-2003. The new Figures 5, 6 and 10 are displayed below

105

106

107

108

109

110  
 111  
 112  
 113  
 114  
 115  
 116  
 117  
 118  
 119  
 120  
 121  
 122

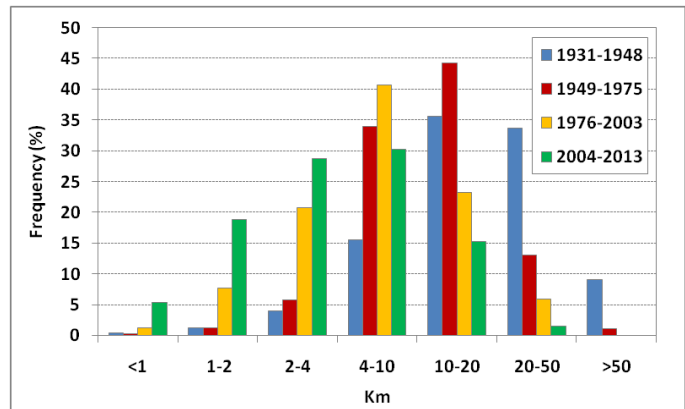

**New Fig. 5.** Frequency distribution of different visibility ranges (Table 2) in Athens for the sub-periods, 1931-1948, 1949-1975, 1976-2003 and 2004-2013.

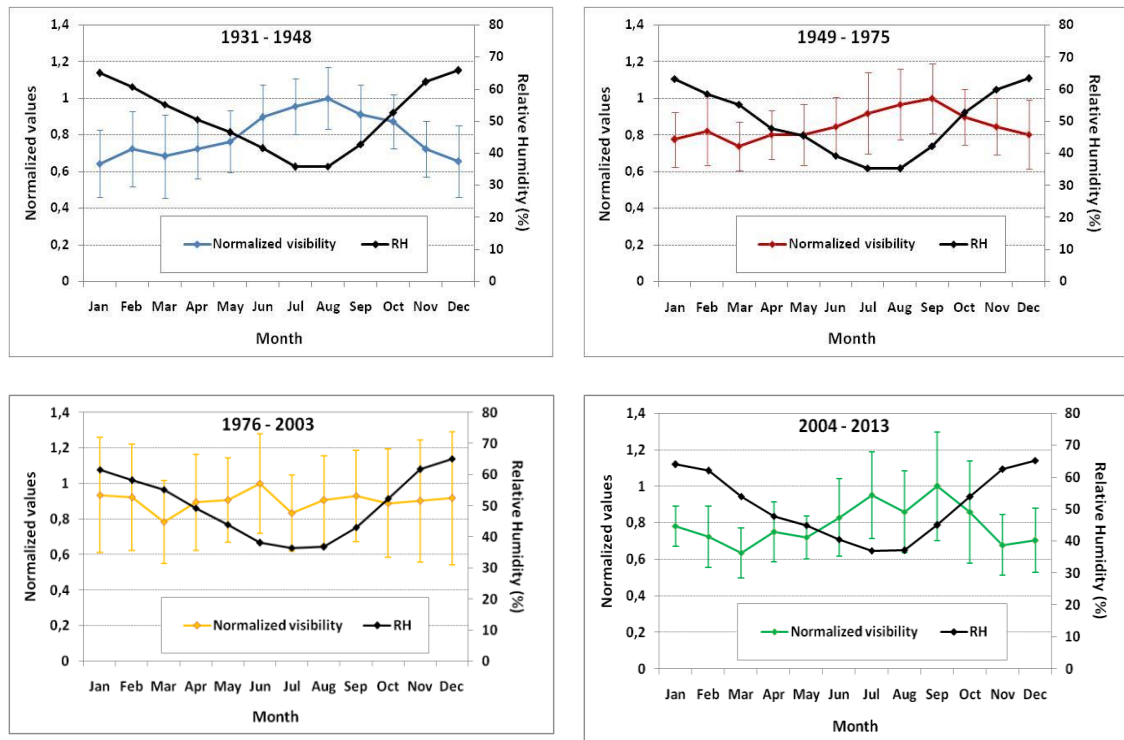

**New Fig. 6.** Normalized mean monthly values of visibility in Athens for the sub-periods 1931-1948, 1949-1975, 1976-2003 and 2004-2013, along with mean monthly values of relative humidity (RH) for each sub-period. Vertical lines represent standard deviations of monthly visibility means.

123  
 124  
 125  
 126  
 127  
 128  
 129

130

131

132

133

134

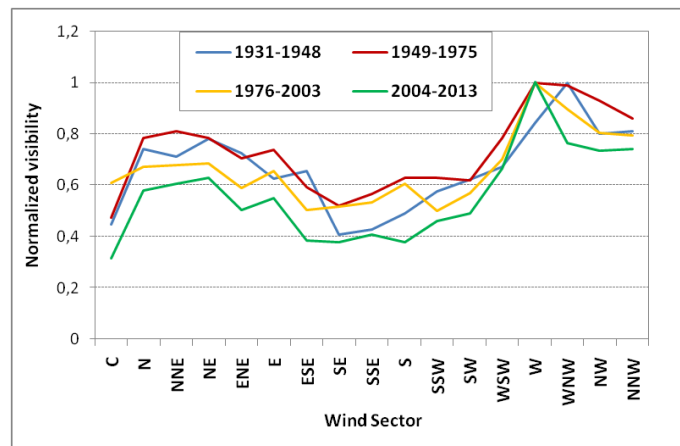

135

136

137

138

139

140

141

142

143

144

145

146

**New Fig. 10.** Variation of visibility with wind direction (sectors) over the sub-periods 1931-1948, 1949-1975, 1976-2003 and 2004-2013. Visibility is normalized by its maximum value at a certain sector for each sub-period. Sector 'C' corresponds to calms (wind speed < 0.3 m s<sup>-1</sup>). Frequency of each sector approximates closely its climatic value (Fig. 3) in all sub-periods.

147

148

The text in the manuscript (sections 3.2, 3.3, 4.4.2 and Conclusions) was revised accordingly, to account for the new information derived from this additional grouping.

149

150

151

152

153

154

155

156

157

**2.** Historical data of other types of emissions in Europe such as NO<sub>x</sub> and OC were also considered and discussed in the analysis. Fig. 11 of the manuscript was reproduced. In the new figure, graph of the rates of changes of SO<sub>2</sub> emissions was replaced with graph of historical emissions as a magnitude, for a more direct comparison with visibility variations. Moreover, a plot of historical NO<sub>x</sub> emissions for Europe was added in Fig. 11. Historical emissions of SO<sub>2</sub> and NO<sub>x</sub> for Europe were now derived from the studies of Vestreng et al. (2007, Fig. 1) and Vestreng et al. (2008, Fig. 4 ) respectively since they provide updated emissions data.

158

159

160

161

162

163

164

165

166

167

168

169

170

171

172

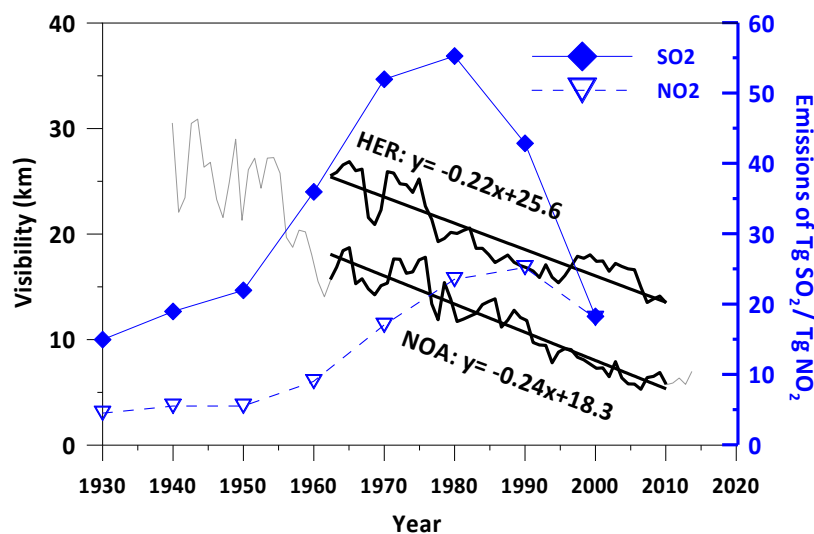

173 **New Fig. 11.** Inter-decadal variability of the annual visibility at NOA (urban) and HER (background)  
174 stations. Bold black lines represent the common period of observations (1956-2009) at the two  
175 stations along with linear trends and slopes. Solid blue line illustrates historical European emissions of  
176 SO<sub>2</sub> as included in Vestreng et al., 2007 and blue dashed line illustrates historical European emissions  
177 of NO<sub>2</sub> as included in Vestreng et al., 2008.

178

179

180 Historical emissions and trends of Organic Carbon as included in the study of Bond et al.,  
181 (2007, Fig. 6) were also discussed. The segregation of emissions according to air mass origin  
182 was also now discussed in the text. Information for segregation was based on the same  
183 studies but also the study of Mylona (1996) and van Aardenne et al., 2001. Emphasis is  
184 given on air masses from N, NE directions (North, Eastern Europe), since on an annual basis,  
185 air masses from the N and NE sectors dominate in the area of interest (Figs 2, 3 of the  
186 manuscript).

187

188 **3.** Section 2.5 has been changed including the reviewer's suggestion to include the AVHRR  
189 analysis in addition to the one of MODIS. In this section, we describe the data set used with  
190 the respective references and the specific analysis and data set details for the Athens case.

191 Then section 3.6 has been changed accordingly including the results of the analysis of AVHRR  
192 data. In addition, we have included a new figure (Fig. 12a) showing the AOD changes in  
193 Athens area from 1981 to 2009 based on AVHRR and we have superimposed the AVHRR  
194 related results to Figure 13, describing now the AOD - visibility index relationship from two  
195 different data sets.

196

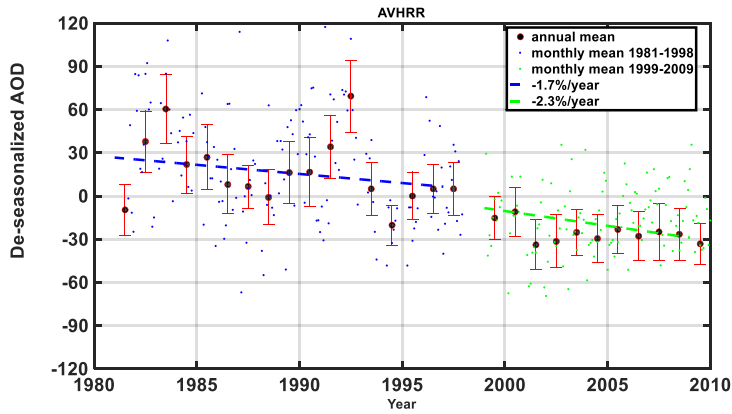

197

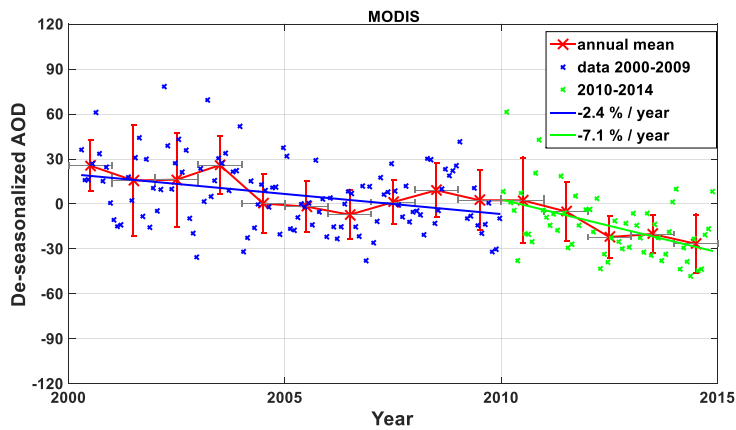

198

199 **New Fig. 12.** a) Variability of deseasonalized monthly AVHRR-based  $AOD_{630nm}$  from 1981 to 2009  
 200 (black), along with linear trends for the periods 1981-1997 (blue), 1998-2009 (green). Vertical bars  
 201 describe the standard deviation of the annual value based on the monthly ones .b) Variability of  
 202 MODIS-based deseasonalized monthly  $AOD_{550nm}$  from 2000 to 2014 (red), along with linear trends for the  
 203 periods 2000-2009 (blue), 2010-2014 (green). Vertical bars describe the standard deviation of the  
 204 annual value based on the monthly ones and grey horizontal bars the respective year.

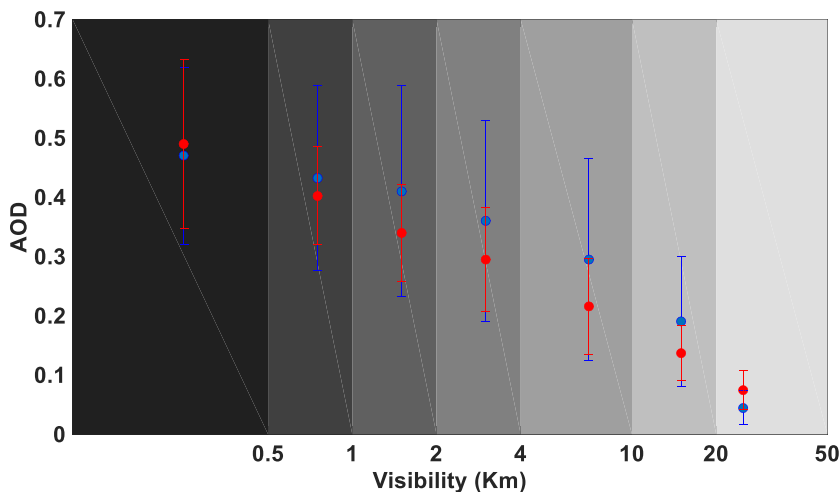

205

206 **New Fig. 13.** MODIS at 550nm (blue) (2000-2014) and AVHRR at 630nm (red) (1991-2009), AOD June-  
 207 August mean values and standard deviations for each visibility index. Shaded areas represent visibility  
 208 ranges (km) for each visibility class (Table 2). AOD averages have been represented here in the  
 209 average distance from each class

210

211

212

213 **Minor comments of referee #1**

214 **1.** All suggested first corrections by the referee were applied in the text. Additional syntax  
215 errors were also found and corrected.

216 **2.** Figure 2a is now referenced in the text before Fig. 2b.

217
